# Supplementary material
Source: publisher figshare collection journal article supplement (https://tandf.figshare.com/articles/dataset/_/18134067)
Supplement: Supplementary file 1 [file 2]

**The representative uncropped blots that include the size marker.**

**Figure 1:**

**
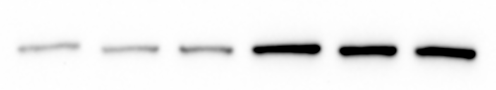
ASS1**

**
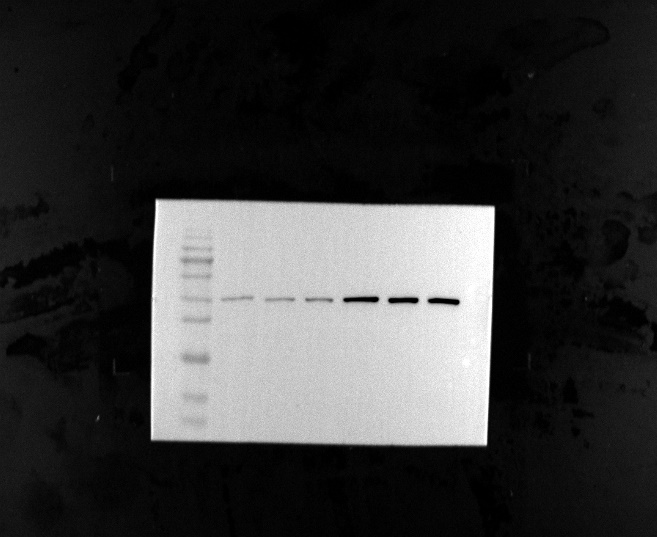
**

**
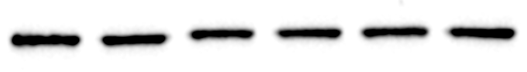
GAPDH**

**
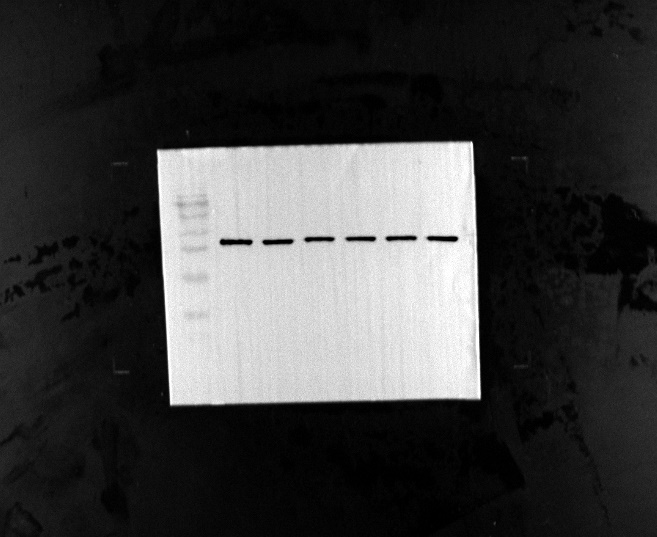
**

**Figure 2:**

**
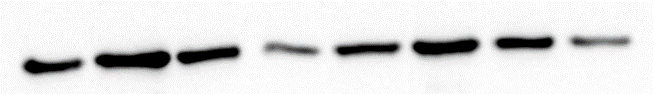
 ASS1**

**
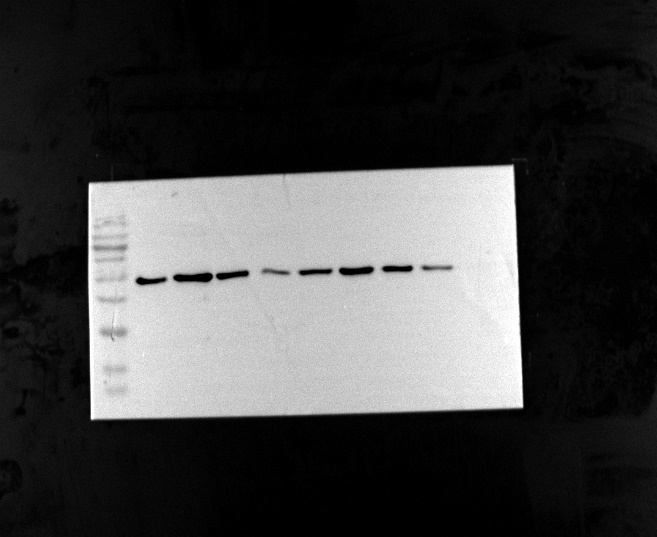
**

**
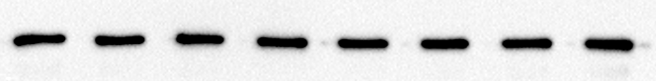
 GAPDH**

**
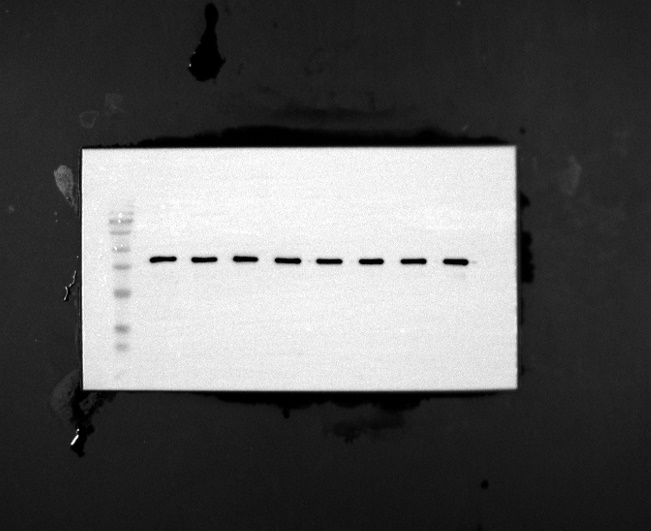
**

**Figure 3:**

**
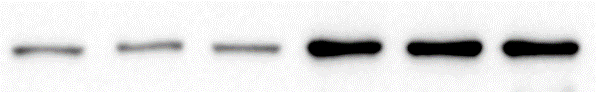
 ASS1**

**
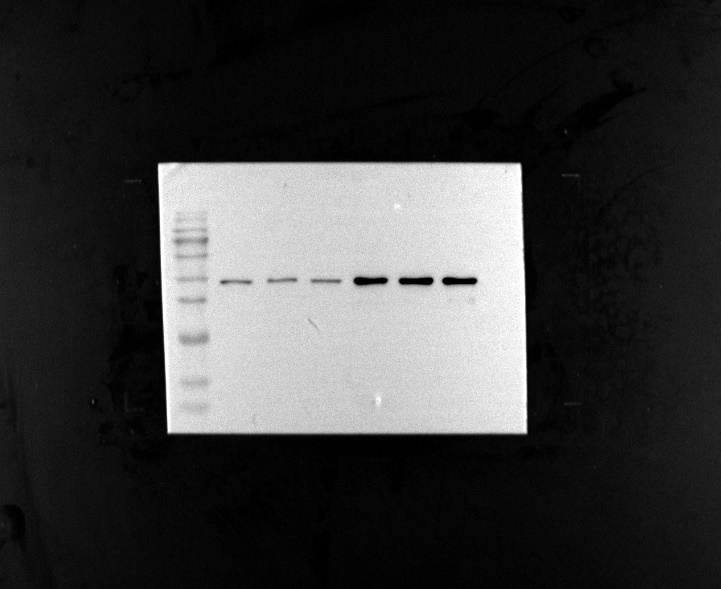
**

**
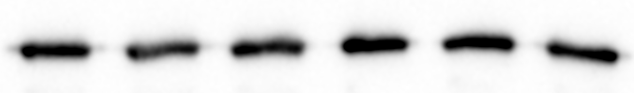
 GAPDH**

**
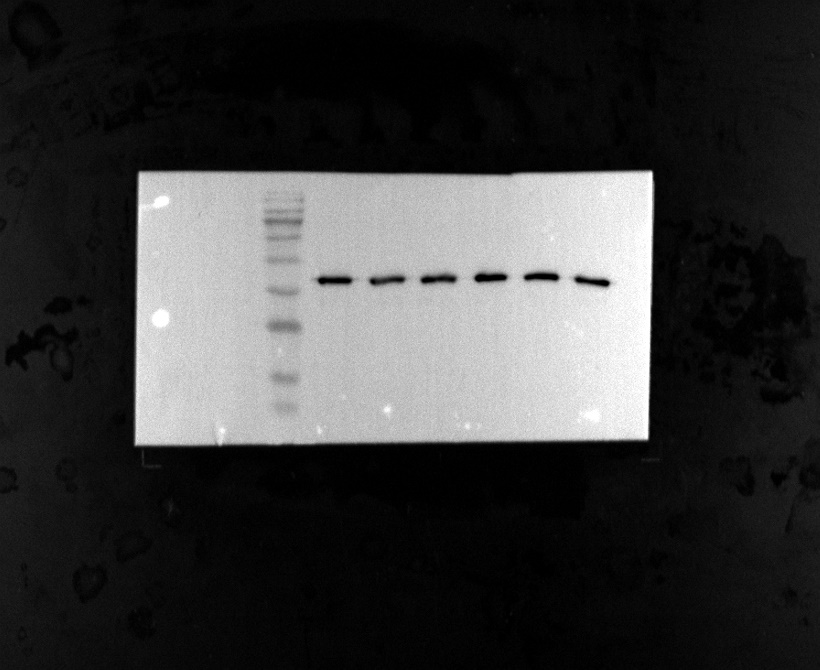
**

**Figure 5:**

**
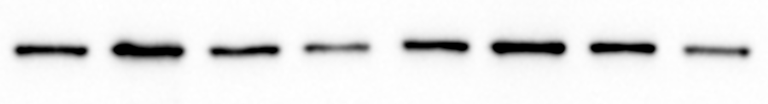
**

**
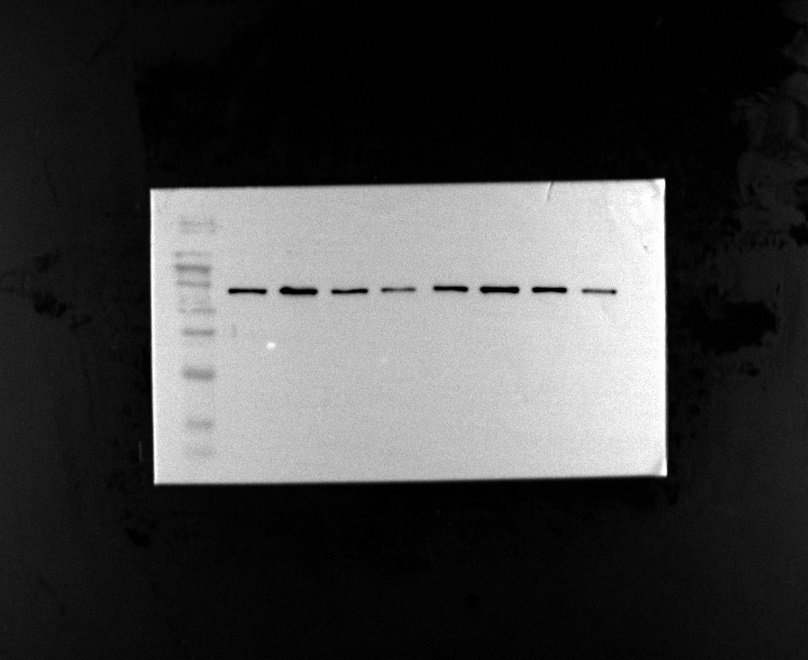
**

**
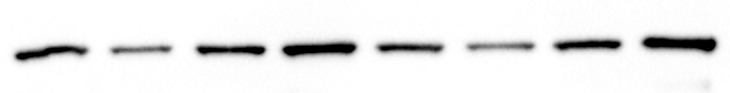
 ASS1**

**
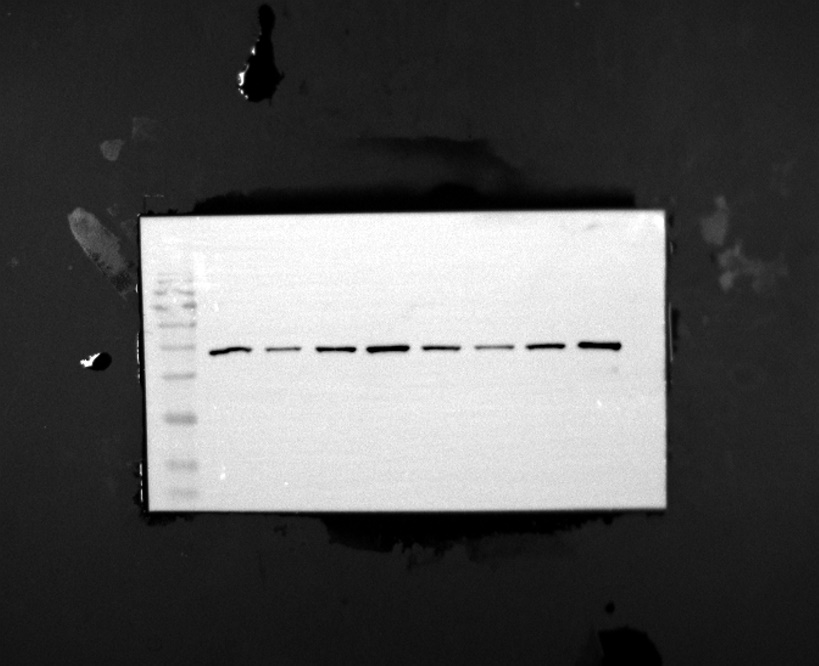
**

**
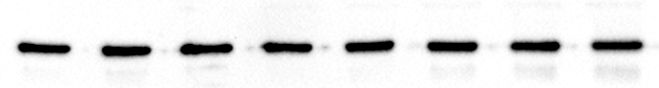
 GAPDH**

**
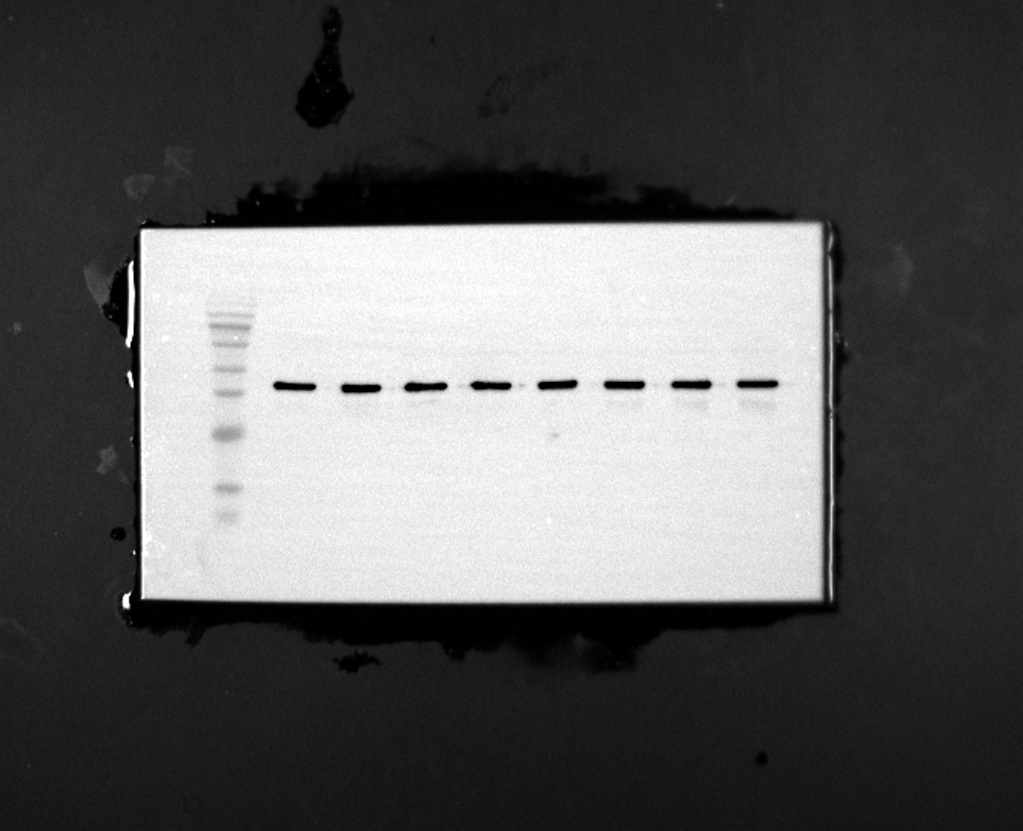
**

**The three independent experiments figures (Figs. 2b, 5d) are shown below.**

**Figure 2B:**

**1.**

**
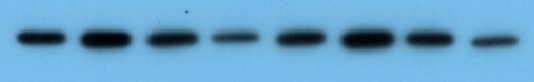
 ASS1**

**
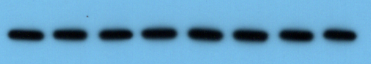
 GAPDH**

**2.**

**
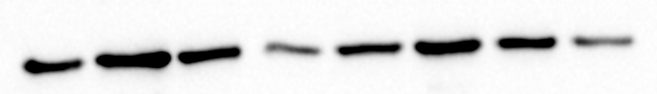
 ASS1**

**
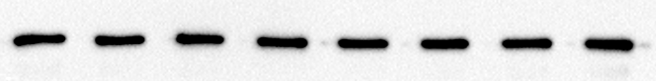
 GAPDH**

**3.**

**
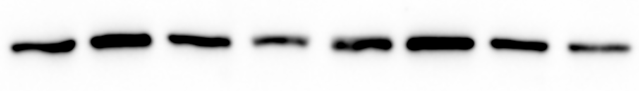
 ASS1**

**
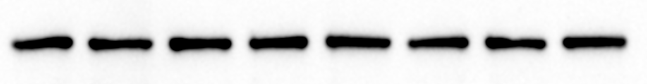
 GAPDH**

**Figure 5D:**

**1.**

**
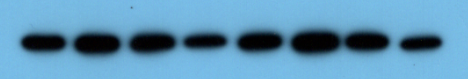
 YTHDF2**

**
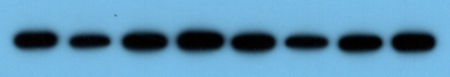
 ASS1**

**
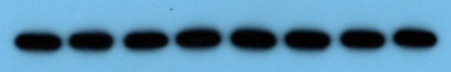
 GAPDH**

**2.**

**
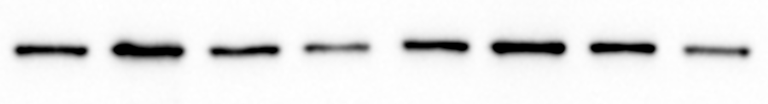
 YTHDF2**

**
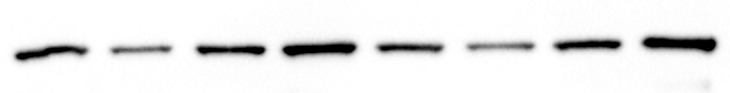
 ASS1**

**
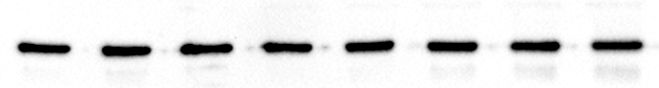
 GAPDH**

**3.**

**
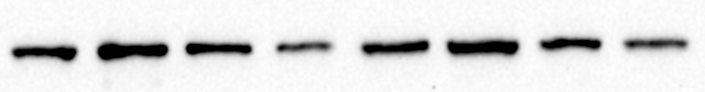
 YTHDF2**

**
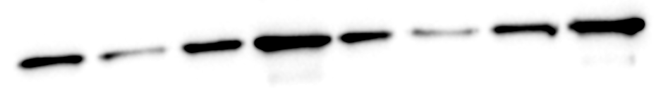
 ASS1**

**
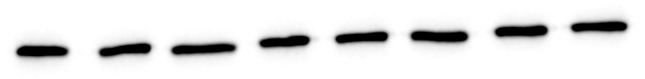
 GAPDH**
